# Supplementary material
Source: MDPI journal article supplement (https://www.mdpi.com/2075-163X/12/8/1026)
Supplement: s1 [file s1]

**Table S1.** U-Pb data of LA-ICP-MS analyses of detrital zircons from metasedimentary and meta-igneous rocks samples of the Wuguan Complex and Liuling Group

|                             | Pb     | Th    | U     |      | <sup>207</sup> Pb/ <sup>206</sup> Pb |        | <sup>207</sup> Pb/ <sup>235</sup> U |        | <sup>206</sup> Pb/ <sup>238</sup> U |        | <sup>207</sup> Pb/ <sup>206</sup> Pb |     | <sup>207</sup> Pb/ <sup>235</sup> U |    | <sup>206</sup> Pb/ <sup>238</sup> U |    |            |                  |                    |
|-----------------------------|--------|-------|-------|------|--------------------------------------|--------|-------------------------------------|--------|-------------------------------------|--------|--------------------------------------|-----|-------------------------------------|----|-------------------------------------|----|------------|------------------|--------------------|
| Grain                       | (ppm)  | (ppm) | (ppm) | Th/U | ratio                                | 1σ     | ratio                               | 1σ     | ratio                               | 1σ     | Age                                  | 1σ  | Age                                 | 1σ | Age                                 | 1σ | Con<br>(%) | Spot<br>position | characteristic     |
| GQ20: Biotite quartz schist |        |       |       |      |                                      |        |                                     |        |                                     |        |                                      |     |                                     |    |                                     |    |            |                  |                    |
| 1                           | 71.3   | 784   | 679   | 1.16 | 0.0596                               | 0.0021 | 0.6023                              | 0.0216 | 0.0724                              | 0.0020 | 590                                  | 52  | 479                                 | 14 | 451                                 | 12 | 94         | core             | Oscillatory zoning |
| 2                           | 45.22  | 207   | 507   | 0.41 | 0.0551                               | 0.0037 | 0.5395                              | 0.0325 | 0.0710                              | 0.0020 | 418                                  | 153 | 438                                 | 21 | 442                                 | 12 | 99         | core             | Oscillatory zoning |
| 3                           | 30.13  | 32.1  | 149   | 0.21 | 0.0788                               | 0.0028 | 1.8779                              | 0.0627 | 0.1719                              | 0.0047 | 1166                                 | 40  | 1073                                | 22 | 1023                                | 26 | 95         | core             | Oscillatory zoning |
| 4                           | 133.8  | 91.7  | 404   | 0.23 | 0.1347                               | 0.0091 | 4.7011                              | 0.2605 | 0.2532                              | 0.0098 | 2160                                 | 121 | 1767                                | 46 | 1455                                | 50 | 81         | core             | Oscillatory zoning |
| 5                           | 111.0  | 146   | 392   | 0.37 | 0.0943                               | 0.0035 | 3.0096                              | 0.0961 | 0.2294                              | 0.0061 | 1514                                 | 34  | 1410                                | 24 | 1331                                | 32 | 94         | core             | Oscillatory zoning |
| 6                           | 15.56  | 126   | 147   | 0.86 | 0.0596                               | 0.0032 | 0.6418                              | 0.0288 | 0.0750                              | 0.0021 | 590                                  | 77  | 503                                 | 18 | 466                                 | 13 | 92         | core             | Planar zoning      |
| 7                           | 71.1   | 582   | 681   | 0.86 | 0.0571                               | 0.0029 | 0.6125                              | 0.0226 | 0.0762                              | 0.0021 | 497                                  | 57  | 485                                 | 14 | 473                                 | 12 | 97         | core             | Oscillatory zoning |
| 8                           | 137.40 | 81.0  | 878   | 0.09 | 0.0741                               | 0.0033 | 1.4062                              | 0.0509 | 0.1376                              | 0.0037 | 1045                                 | 93  | 892                                 | 21 | 831                                 | 21 | 93         | core             | Oscillatory zoning |
| 9                           | 118.4  | 1054  | 470   | 2.24 | 0.0748                               | 0.0036 | 1.4489                              | 0.0572 | 0.1389                              | 0.0038 | 1063                                 | 58  | 909                                 | 24 | 839                                 | 22 | 92         | core             | Oscillatory zoning |
| 10                          | 73.7   | 380   | 708   | 0.54 | 0.0608                               | 0.0026 | 0.7013                              | 0.0258 | 0.0826                              | 0.0023 | 632                                  | 54  | 540                                 | 15 | 512                                 | 13 | 95         | core             | Oscillatory zoning |
| 11                          | 7.27   | 44.1  | 77.5  | 0.57 | 0.0579                               | 0.0035 | 0.5885                              | 0.0313 | 0.0741                              | 0.0022 | 526                                  | 99  | 470                                 | 20 | 461                                 | 13 | 98         | core             | Planar zoning      |
| 12                          | 58.3   | 82.6  | 175   | 0.47 | 0.1013                               | 0.0058 | 3.4530                              | 0.1680 | 0.2472                              | 0.0075 | 1648                                 | 109 | 1517                                | 38 | 1424                                | 39 | 94         | core             | Oscillatory zoning |
| 13                          | 67.5   | 449   | 725   | 0.62 | 0.0586                               | 0.0022 | 0.5923                              | 0.0193 | 0.0727                              | 0.0020 | 551                                  | 41  | 472                                 | 12 | 453                                 | 12 | 96         | core             | Oscillatory zoning |
| 14                          | 26.8   | 233   | 263   | 0.89 | 0.0560                               | 0.0023 | 0.5802                              | 0.0224 | 0.0748                              | 0.0021 | 451                                  | 60  | 465                                 | 14 | 465                                 | 13 | 100        | core             | Oscillatory zoning |
| 15                          | 126.8  | 322   | 740   | 0.44 | 0.0698                               | 0.0024 | 1.3420                              | 0.0428 | 0.1386                              | 0.0039 | 922                                  | 32  | 864                                 | 19 | 837                                 | 22 | 97         | core             | Oscillatory zoning |
| 16                          | 84.7   | 441   | 964   | 0.46 | 0.0564                               | 0.0019 | 0.5638                              | 0.0181 | 0.0721                              | 0.0020 | 468                                  | 35  | 454                                 | 12 | 449                                 | 12 | 99         | core             | Oscillatory zoning |
| 17                          | 181.2  | 652   | 2307  | 0.28 | 0.0543                               | 0.0031 | 0.4723                              | 0.0242 | 0.0631                              | 0.0017 | 382                                  | 134 | 393                                 | 17 | 395                                 | 10 | 99         | core             | Oscillatory zoning |
| 18                          | 6.71   | 31.5  | 70.5  | 0.45 | 0.0610                               | 0.0033 | 0.6099                              | 0.0323 | 0.0736                              | 0.0024 | 640                                  | 92  | 484                                 | 20 | 458                                 | 14 | 94         | core             | Planar zoning      |
| 19                          | 40.83  | 132   | 308   | 0.43 | 0.0789                               | 0.0083 | 1.0271                              | 0.1007 | 0.0944                              | 0.0035 | 1170                                 | 216 | 717                                 | 50 | 582                                 | 20 | 79         | core             | Oscillatory zoning |
| 20                          | 70.7   | 918   | 609   | 1.51 | 0.0565                               | 0.0018 | 0.5532                              | 0.0172 | 0.0709                              | 0.0019 | 471                                  | 37  | 447                                 | 11 | 441                                 | 11 | 99         | core             | Oscillatory zoning |
| 21                          | 30.95  | 96.5  | 177   | 0.54 | 0.0642                               | 0.0025 | 1.2014                              | 0.0398 | 0.1329                              | 0.0036 | 749                                  | 42  | 801                                 | 18 | 805                                 | 20 | 100        | core             | Oscillatory zoning |

|    |        |      |      |      |        |        |        |        |        |        |      |     |      |    |      |    |     |      |                    |
|----|--------|------|------|------|--------|--------|--------|--------|--------|--------|------|-----|------|----|------|----|-----|------|--------------------|
| 22 | 150.0  | 241  | 726  | 0.33 | 0.0712 | 0.0021 | 1.6543 | 0.0477 | 0.1679 | 0.0044 | 962  | 25  | 991  | 18 | 1000 | 24 | 99  | core | Oscillatory zoning |
| 23 | 19.01  | 190  | 160  | 1.18 | 0.0560 | 0.0025 | 0.6202 | 0.0268 | 0.0807 | 0.0023 | 451  | 74  | 490  | 17 | 500  | 14 | 98  | core | Oscillatory zoning |
| 24 | 221.7  | 141  | 1000 | 0.14 | 0.0743 | 0.0022 | 1.9695 | 0.0578 | 0.1915 | 0.0052 | 1051 | 23  | 1105 | 20 | 1129 | 28 | 98  | core | Oscillatory zoning |
| 25 | 49.0   | 471  | 514  | 0.92 | 0.0580 | 0.0018 | 0.5366 | 0.0172 | 0.0667 | 0.0018 | 531  | 40  | 436  | 11 | 416  | 11 | 95  | core | Oscillatory zoning |
| 26 | 74.07  | 308  | 961  | 0.32 | 0.0556 | 0.0043 | 0.5112 | 0.0366 | 0.0667 | 0.0019 | 437  | 177 | 419  | 25 | 416  | 12 | 99  | core | Oscillatory zoning |
| 27 | 144.6  | 126  | 661  | 0.19 | 0.1074 | 0.0058 | 2.4381 | 0.1079 | 0.1646 | 0.0051 | 1756 | 102 | 1254 | 32 | 982  | 28 | 76  | core | Oscillatory zoning |
| 28 | 36.7   | 273  | 359  | 0.76 | 0.0560 | 0.0019 | 0.5734 | 0.0190 | 0.0743 | 0.0020 | 451  | 44  | 460  | 12 | 462  | 12 | 100 | core | Oscillatory zoning |
| 29 | 24.9   | 242  | 237  | 1.02 | 0.0554 | 0.0021 | 0.5538 | 0.0197 | 0.0708 | 0.0019 | 430  | 52  | 447  | 13 | 441  | 12 | 99  | core | Oscillatory zoning |
| 30 | 27.32  | 80.5 | 135  | 0.60 | 0.0728 | 0.0027 | 1.5263 | 0.0540 | 0.1520 | 0.0041 | 1007 | 48  | 941  | 22 | 912  | 23 | 97  | core | Planar zoning      |
| 31 | 49.69  | 60.2 | 210  | 0.29 | 0.0805 | 0.0025 | 2.1046 | 0.0675 | 0.1886 | 0.0050 | 1210 | 36  | 1150 | 22 | 1114 | 27 | 97  | core | Oscillatory zoning |
| 32 | 134.74 | 85.4 | 616  | 0.14 | 0.0782 | 0.0030 | 1.6635 | 0.1306 | 0.1400 | 0.0077 | 1153 | 114 | 995  | 50 | 845  | 44 | 84  | core | Oscillatory zoning |
| 33 | 59.9   | 389  | 755  | 0.52 | 0.0555 | 0.0018 | 0.4934 | 0.0156 | 0.0645 | 0.0018 | 432  | 37  | 407  | 11 | 403  | 11 | 99  | core | Oscillatory zoning |
| 34 | 16.08  | 121  | 79.9 | 1.51 | 0.0648 | 0.0027 | 1.1209 | 0.0440 | 0.1263 | 0.0035 | 767  | 60  | 763  | 21 | 767  | 20 | 99  | core | Oscillatory zoning |
| 35 | 70.4   | 371  | 617  | 0.60 | 0.0646 | 0.0020 | 0.7818 | 0.0249 | 0.0875 | 0.0023 | 761  | 38  | 587  | 14 | 540  | 14 | 92  | core | Oscillatory zoning |
| 36 | 82.3   | 94.8 | 446  | 0.21 |        |        |        |        |        |        |      |     |      |    |      | 12 | 91  | core | Oscillatory zoning |
|    |        |      |      |      | 0.0759 | 0.0037 | 2.8570 | 0.3160 | 0.2607 | 0.0238 | 1092 | 128 | 1371 | 83 | 1493 | 2  |     |      |                    |
| 37 | 24.7   | 247  | 229  | 1.08 | 0.0538 | 0.0022 | 0.5685 | 0.0220 | 0.0749 | 0.0020 | 363  | 64  | 457  | 14 | 466  | 12 | 98  | core | Oscillatory zoning |
| 38 | 26.77  | 67.2 | 310  | 0.22 | 0.0570 | 0.0019 | 0.5857 | 0.0189 | 0.0744 | 0.0020 | 492  | 39  | 468  | 12 | 463  | 12 | 99  | core | Oscillatory zoning |
| 39 | 87.7   | 197  | 252  | 0.78 | 0.0939 | 0.0030 | 3.3095 | 0.1099 | 0.2543 | 0.0076 | 1507 | 29  | 1483 | 26 | 1460 | 39 | 98  | core | Oscillatory zoning |
| 40 | 10.65  | 72.0 | 109  | 0.66 | 0.0461 | 0.0094 | 0.4443 | 0.0888 | 0.0700 | 0.0025 |      | 343 | 373  | 62 | 436  | 15 | 84  | core | Oscillatory zoning |
| 41 | 13.52  | 103  | 63.9 | 1.62 | 0.0663 | 0.0029 | 1.2141 | 0.0541 | 0.1329 | 0.0038 | 816  | 72  | 807  | 25 | 804  | 22 | 100 | core | Oscillatory zoning |
| 42 | 30.7   | 276  | 311  | 0.89 | 0.0545 | 0.0018 | 0.5512 | 0.0188 | 0.0731 | 0.0020 | 392  | 48  | 446  | 12 | 455  | 12 | 98  | core | Oscillatory zoning |
| 43 | 53.6   | 316  | 292  | 1.08 | 0.0645 | 0.0022 | 1.1638 | 0.0388 | 0.1306 | 0.0035 | 756  | 44  | 784  | 18 | 791  | 20 | 99  | core | Oscillatory zoning |
| 44 | 54.2   | 229  | 624  | 0.37 | 0.0556 | 0.0018 | 0.5627 | 0.0181 | 0.0732 | 0.0020 | 436  | 41  | 453  | 12 | 456  | 12 | 99  | core | Oscillatory zoning |
| 45 | 47.9   | 389  | 467  | 0.83 | 0.0577 | 0.0020 | 0.6101 | 0.0211 | 0.0766 | 0.0021 | 518  | 49  | 484  | 13 | 476  | 12 | 98  | core | Oscillatory zoning |
| 46 | 65.0   | 452  | 732  | 0.62 | 0.0592 | 0.0019 | 0.5683 | 0.0184 | 0.0694 | 0.0018 | 573  | 42  | 457  | 12 | 433  | 11 | 95  | core | Oscillatory zoning |

|    |        |      |      |      |        |        |         |        |        |        |      |     |      |    |      |    |     |      |                    |
|----|--------|------|------|------|--------|--------|---------|--------|--------|--------|------|-----|------|----|------|----|-----|------|--------------------|
| 47 | 79.0   | 171  | 362  | 0.47 | 0.0685 | 0.0022 | 1.6996  | 0.0564 | 0.1795 | 0.0048 | 883  | 41  | 1008 | 21 | 1064 | 26 | 95  | core | Oscillatory zoning |
| 48 | 29.39  | 175  | 324  | 0.54 | 0.0549 | 0.0021 | 0.5557  | 0.0213 | 0.0734 | 0.0020 | 407  | 61  | 449  | 14 | 457  | 12 | 98  | core | Oscillatory zoning |
| 49 | 206.78 | 214  | 3240 | 0.07 | 0.0605 | 0.0031 | 0.4790  | 0.0202 | 0.0574 | 0.0017 | 622  | 113 | 397  | 14 | 360  | 10 | 90  | core | Oscillatory zoning |
| 50 | 14.89  | 74.8 | 143  | 0.52 | 0.0575 | 0.0054 | 0.6330  | 0.0568 | 0.0798 | 0.0023 | 511  | 215 | 498  | 35 | 495  | 14 | 99  | core | Planar zoning      |
| 51 | 255.9  | 355  | 808  | 0.44 | 0.0921 | 0.0048 | 3.1820  | 0.1403 | 0.2506 | 0.0068 | 1469 | 101 | 1453 | 34 | 1441 | 35 | 99  | core | Oscillatory zoning |
| 52 | 23.69  | 138  | 268  | 0.51 | 0.0574 | 0.0026 | 0.5710  | 0.0200 | 0.0696 | 0.0019 | 506  | 49  | 459  | 13 | 434  | 11 | 94  | core | Oscillatory zoning |
| 53 | 31.44  | 75.4 | 190  | 0.40 | 0.0697 | 0.0026 | 1.3058  | 0.0484 | 0.1368 | 0.0043 | 918  | 42  | 848  | 21 | 827  | 24 | 97  | core | Oscillatory zoning |
| 54 | 25.47  | 96.0 | 132  | 0.73 | 0.0683 | 0.0025 | 1.4068  | 0.0502 | 0.1490 | 0.0041 | 877  | 49  | 892  | 21 | 895  | 23 | 100 | core | fir-tree zoning    |
| 55 | 129.75 | 72.7 | 518  | 0.14 | 0.0833 | 0.0027 | 2.5536  | 0.0749 | 0.2216 | 0.0058 | 1276 | 27  | 1287 | 21 | 1290 | 30 | 100 | core | Oscillatory zoning |
| 56 | 30.48  | 215  | 325  | 0.66 | 0.0578 | 0.0022 | 0.5893  | 0.0218 | 0.0739 | 0.0020 | 521  | 57  | 470  | 14 | 460  | 12 | 98  | core | Oscillatory zoning |
| 57 | 62.1   | 89.9 | 88.3 | 1.02 | 0.1691 | 0.0053 | 11.0161 | 0.3416 | 0.4729 | 0.0129 | 2549 | 25  | 2524 | 29 | 2496 | 56 | 99  | core | Planar zoning      |
| 58 | 20.22  | 117  | 97.5 | 1.20 | 0.0641 | 0.0026 | 1.2994  | 0.0504 | 0.1467 | 0.0040 | 745  | 59  | 845  | 22 | 883  | 23 | 96  | core | Oscillatory zoning |
| 59 | 33.3   | 158  | 181  | 0.87 | 0.0665 | 0.0023 | 1.2421  | 0.0422 | 0.1360 | 0.0038 | 823  | 42  | 820  | 19 | 822  | 21 | 100 | core | Oscillatory zoning |
| 60 | 57.8   | 120  | 350  | 0.34 | 0.0676 | 0.0021 | 1.3360  | 0.0433 | 0.1427 | 0.0039 | 857  | 37  | 861  | 19 | 860  | 22 | 100 | core | Oscillatory zoning |
| 61 | 27.5   | 153  | 133  | 1.15 | 0.0687 | 0.0025 | 1.3802  | 0.0456 | 0.1460 | 0.0040 | 890  | 39  | 881  | 19 | 878  | 22 | 100 | core | Oscillatory zoning |
| 62 | 32.30  | 114  | 191  | 0.59 | 0.0643 | 0.0024 | 1.1922  | 0.0399 | 0.1345 | 0.0037 | 751  | 42  | 797  | 18 | 814  | 21 | 98  | core | Oscillatory zoning |
| 63 | 169.02 | 53.7 | 831  | 0.06 | 0.0772 | 0.0024 | 2.0134  | 0.0667 | 0.1883 | 0.0054 | 1126 | 35  | 1120 | 22 | 1112 | 29 | 99  | core | Oscillatory zoning |
| 64 | 82.4   | 108  | 469  | 0.23 | 0.0862 | 0.0147 | 2.0603  | 0.3199 | 0.1734 | 0.0124 | 1342 | 357 | 1136 | 10 | 1031 | 68 | 90  | core | Oscillatory zoning |
| 65 | 77.6   | 111  | 423  | 0.26 |        |        |         |        |        |        |      |     |      | 6  |      |    |     |      |                    |
| 66 | 196.0  | 1514 | 2416 | 0.63 | 0.0553 | 0.0017 | 0.4950  | 0.0153 | 0.0651 | 0.0017 | 425  | 36  | 408  | 10 | 407  | 10 | 100 | core | Oscillatory zoning |
| 67 | 30.55  | 102  | 210  | 0.49 | 0.0638 | 0.0023 | 1.0437  | 0.0411 | 0.1180 | 0.0040 | 735  | 43  | 726  | 20 | 719  | 23 | 99  | core | Oscillatory zoning |
| 68 | 135.9  | 214  | 279  | 0.77 | 0.1290 | 0.0044 | 6.2057  | 0.2264 | 0.3493 | 0.0095 | 2084 | 44  | 2005 | 32 | 1931 | 45 | 96  | core | Planar zoning      |
| 69 | 71.5   | 195  | 86.2 | 2.26 | 0.1622 | 0.0051 | 10.0438 | 0.3118 | 0.4525 | 0.0122 | 2479 | 27  | 2439 | 29 | 2406 | 54 | 99  | core | Planar zoning      |
| 70 | 35.95  | 216  | 397  | 0.55 | 0.0570 | 0.0021 | 0.5561  | 0.0195 | 0.0716 | 0.0020 | 490  | 50  | 449  | 13 | 446  | 12 | 99  | core | Oscillatory zoning |
| 71 | 62.1   | 388  | 720  | 0.54 | 0.0579 | 0.0019 | 0.5576  | 0.0184 | 0.0705 | 0.0020 | 526  | 40  | 450  | 12 | 439  | 12 | 98  | core | Oscillatory zoning |

|                                 |       |      |      |      |        |        |        |        |        |        |      |     |      |    |      |    |     |      |                    |
|---------------------------------|-------|------|------|------|--------|--------|--------|--------|--------|--------|------|-----|------|----|------|----|-----|------|--------------------|
| 72                              | 47.5  | 182  | 280  | 0.65 | 0.0676 | 0.0025 | 1.2228 | 0.0427 | 0.1292 | 0.0035 | 857  | 46  | 811  | 20 | 783  | 20 | 96  | core | Oscillatory zoning |
| TW43: Garnet mica quartz schist |       |      |      |      |        |        |        |        |        |        |      |     |      |    |      |    |     |      |                    |
| 1                               | 129.2 | 137  | 733  | 0.19 | 0.0736 | 0.0036 | 1.5980 | 0.0659 | 0.1574 | 0.0042 | 1031 | 102 | 969  | 26 | 943  | 24 | 97  | core | Oscillatory zoning |
| 2                               | 45.23 | 57.2 | 267  | 0.21 | 0.0730 | 0.0038 | 1.5205 | 0.0664 | 0.1511 | 0.0043 | 1014 | 108 | 939  | 27 | 907  | 24 | 97  | core | Oscillatory zoning |
| 3                               | 96.6  | 755  | 1004 | 0.75 | 0.0611 | 0.0022 | 0.6326 | 0.0219 | 0.0752 | 0.0021 | 643  | 47  | 498  | 14 | 468  | 12 | 94  | core | Oscillatory zoning |
| 4                               | 119.3 | 160  | 718  | 0.22 | 0.0717 | 0.0035 | 1.4792 | 0.0594 | 0.1497 | 0.0040 | 977  | 101 | 922  | 24 | 899  | 22 | 97  | core | Oscillatory zoning |
| 5                               | 19.35 | 79.3 | 126  | 0.63 | 0.0631 | 0.0055 | 1.0712 | 0.0874 | 0.1231 | 0.0038 | 713  | 192 | 739  | 43 | 748  | 22 | 99  | core | fir-tree zoning    |
| 6                               | 28.62 | 163  | 343  | 0.48 | 0.0667 | 0.0032 | 0.6382 | 0.0271 | 0.0693 | 0.0019 | 830  | 69  | 501  | 17 | 432  | 11 | 85  | core | Oscillatory zoning |
| 7                               | 159.5 | 180  | 301  | 0.60 | 0.1643 | 0.0088 | 9.1199 | 0.4067 | 0.4025 | 0.0117 | 2501 | 92  | 2350 | 41 | 2181 | 54 | 93  | core | Oscillatory zoning |
| 8                               | 407   | 806  | 1385 | 0.58 | 0.0861 | 0.0064 | 2.6740 | 0.1805 | 0.2252 | 0.0069 | 1341 | 148 | 1321 | 50 | 1309 | 36 | 99  | core | Oscillatory zoning |
| 9                               | 8.35  | 32.1 | 71.9 | 0.45 | 0.0905 | 0.0064 | 1.2240 | 0.0742 | 0.0927 | 0.0034 | 1437 | 95  | 812  | 34 | 572  | 20 | 65  | core | Oscillatory zoning |
| 10                              | 21.96 | 185  | 247  | 0.75 | 0.0636 | 0.0034 | 0.6134 | 0.0275 | 0.0699 | 0.0020 | 727  | 76  | 486  | 17 | 435  | 12 | 89  | core | Oscillatory zoning |
| 11                              | 240.1 | 461  | 618  | 0.75 | 0.1145 | 0.0045 | 4.8563 | 0.1596 | 0.3063 | 0.0082 | 1871 | 35  | 1795 | 28 | 1723 | 40 | 96  | core | Oscillatory zoning |
| 12                              | 146.7 | 189  | 313  | 0.61 | 0.1348 | 0.0075 | 6.7886 | 0.3182 | 0.3652 | 0.0108 | 2162 | 99  | 2084 | 41 | 2007 | 51 | 96  | core | Oscillatory zoning |
| 13                              | 42.8  | 262  | 455  | 0.58 | 0.0561 | 0.0044 | 0.5866 | 0.0426 | 0.0758 | 0.0022 | 457  | 179 | 469  | 27 | 471  | 13 | 100 | core | Oscillatory zoning |
| 14                              | 7.93  | 0.37 | 163  | 0.00 | 0.0594 | 0.0041 | 0.3813 | 0.0239 | 0.0465 | 0.0014 | 581  | 123 | 328  | 18 | 293  | 9  | 89  | rim  | bright rim         |
| 15                              | 12.10 | 73.5 | 141  | 0.52 | 0.0616 | 0.0054 | 0.5708 | 0.0465 | 0.0673 | 0.0021 | 658  | 193 | 459  | 30 | 420  | 12 | 91  | core | planar zoning      |
| 16                              | 166.3 | 151  | 470  | 0.32 | 0.1149 | 0.0041 | 4.9053 | 0.1675 | 0.3066 | 0.0084 | 1879 | 38  | 1803 | 29 | 1724 | 41 | 96  | core | Oscillatory zoning |
| 17                              | 303.4 | 134  | 1476 | 0.09 | 0.0818 | 0.0029 | 2.1725 | 0.0742 | 0.1906 | 0.0052 | 1241 | 42  | 1172 | 24 | 1125 | 28 | 96  | core | Oscillatory zoning |
| 18                              | 16.22 | 148  | 217  | 0.68 | 0.0556 | 0.0052 | 0.4403 | 0.0388 | 0.0575 | 0.0018 | 435  | 213 | 370  | 27 | 360  | 11 | 97  | core | Oscillatory zoning |
| 19                              | 52.1  | 181  | 330  | 0.55 | 0.0652 | 0.0028 | 1.1665 | 0.0423 | 0.1291 | 0.0036 | 779  | 51  | 785  | 20 | 782  | 20 | 100 | core | Oscillatory zoning |
| 20                              | 112.6 | 381  | 712  | 0.53 | 0.0669 | 0.0024 | 1.2301 | 0.0415 | 0.1293 | 0.0035 | 836  | 43  | 814  | 19 | 784  | 20 | 96  | core | Oscillatory zoning |
| 21                              | 17.92 | 105  | 103  | 1.02 | 0.0667 | 0.0034 | 1.1938 | 0.0577 | 0.1302 | 0.0039 | 827  | 81  | 798  | 27 | 789  | 22 | 99  | core | Oscillatory zoning |
| 22                              | 40.2  | 282  | 440  | 0.64 | 0.0562 | 0.0023 | 0.5690 | 0.0218 | 0.0730 | 0.0020 | 460  | 60  | 457  | 14 | 454  | 12 | 99  | core | Oscillatory zoning |
| 23                              | 134.2 | 145  | 358  | 0.41 | 0.1119 | 0.0038 | 4.8468 | 0.1638 | 0.3121 | 0.0086 | 1830 | 36  | 1793 | 28 | 1751 | 42 | 98  | core | Oscillatory zoning |
| 24                              | 102.0 | 157  | 335  | 0.47 | 0.0945 | 0.0034 | 3.4043 | 0.1453 | 0.2569 | 0.0083 | 1517 | 54  | 1505 | 34 | 1474 | 43 | 98  | core | Oscillatory zoning |

|    |       |      |      |      |        |        |         |        |        |        |      |     |      |    |      |    |     |      |                    |
|----|-------|------|------|------|--------|--------|---------|--------|--------|--------|------|-----|------|----|------|----|-----|------|--------------------|
| 25 | 64.6  | 92.5 | 140  | 0.66 | 0.1189 | 0.0045 | 5.9240  | 0.2133 | 0.3590 | 0.0101 | 1940 | 41  | 1965 | 31 | 1977 | 48 | 99  | core | Oscillatory zoning |
| 26 | 122.8 | 271  | 724  | 0.37 | 0.0666 | 0.0024 | 1.3632  | 0.0469 | 0.1475 | 0.0041 | 824  | 43  | 873  | 20 | 887  | 23 | 98  | core | Oscillatory zoning |
| 27 | 18.11 | 134  | 207  | 0.65 | 0.0486 | 0.0023 | 0.4709  | 0.0217 | 0.0702 | 0.0020 | 129  | 84  | 392  | 15 | 437  | 12 | 89  | core | Oscillatory zoning |
| 28 | 133.1 | 749  | 395  | 1.89 | 0.0777 | 0.0028 | 2.2594  | 0.0755 | 0.2096 | 0.0057 | 1140 | 39  | 1200 | 24 | 1227 | 30 | 98  | core | Oscillatory zoning |
| 29 | 105.1 | 191  | 446  | 0.43 | 0.0752 | 0.0025 | 2.0929  | 0.0701 | 0.2005 | 0.0054 | 1074 | 41  | 1146 | 23 | 1178 | 29 | 97  | core | Oscillatory zoning |
| 30 | 224.0 | 156  | 389  | 0.40 | 0.1625 | 0.0052 | 10.3564 | 0.3281 | 0.4592 | 0.0122 | 2482 | 30  | 2467 | 29 | 2436 | 54 | 99  | core | Oscillatory zoning |
| 31 | 481.5 | 70.2 | 966  | 0.07 | 0.1531 | 0.0048 | 9.2074  | 0.2898 | 0.4331 | 0.0116 | 2381 | 29  | 2359 | 29 | 2319 | 52 | 98  | core | Oscillatory zoning |
| 32 | 73.1  | 123  | 406  | 0.30 | 0.0661 | 0.0024 | 1.4600  | 0.0522 | 0.1594 | 0.0044 | 809  | 49  | 914  | 22 | 953  | 24 | 96  | core | Oscillatory zoning |
| 33 | 70.3  | 208  | 338  | 0.61 | 0.0705 | 0.0026 | 1.6689  | 0.0564 | 0.1713 | 0.0047 | 944  | 41  | 997  | 21 | 1019 | 26 | 98  | core | Oscillatory zoning |
| 34 | 98.8  | 229  | 220  | 1.04 | 0.1083 | 0.0036 | 4.8473  | 0.1594 | 0.3235 | 0.0088 | 1771 | 35  | 1793 | 28 | 1807 | 43 | 99  | core | Oscillatory zoning |
| 35 | 77.2  | 109  | 199  | 0.55 | 0.1079 | 0.0037 | 4.6717  | 0.1579 | 0.3128 | 0.0085 | 1764 | 37  | 1762 | 28 | 1754 | 42 | 100 | core | Oscillatory zoning |
| 36 | 38.1  | 54.2 | 57.5 | 0.94 | 0.1610 | 0.0063 | 10.4508 | 0.3761 | 0.4699 | 0.0133 | 2467 | 38  | 2476 | 33 | 2483 | 58 | 100 | core | Oscillatory zoning |
| 37 | 5.72  | 17.8 | 27.7 | 0.64 | 0.0713 | 0.0058 | 1.5545  | 0.1080 | 0.1560 | 0.0054 | 965  | 127 | 952  | 43 | 934  | 30 | 98  | core | planar zoning      |
| 38 | 28.0  | 256  | 290  | 0.88 | 0.0616 | 0.0030 | 0.6195  | 0.0285 | 0.0733 | 0.0021 | 659  | 80  | 490  | 18 | 456  | 12 | 93  | core | Oscillatory zoning |
| 39 | 73.0  | 111  | 181  | 0.61 | 0.1103 | 0.0042 | 4.8138  | 0.1723 | 0.3162 | 0.0087 | 1804 | 43  | 1787 | 30 | 1771 | 43 | 99  | core | Oscillatory zoning |
| 40 | 102.3 | 98.0 | 456  | 0.21 | 0.0855 | 0.0034 | 2.3226  | 0.0943 | 0.2077 | 0.0158 | 1328 | 81  | 1219 | 29 | 1217 | 84 | 99  | core | Oscillatory zoning |
| 41 | 31.36 | 82.4 | 140  | 0.59 | 0.0756 | 0.0035 | 1.9061  | 0.0790 | 0.1757 | 0.0050 | 1083 | 62  | 1083 | 28 | 1043 | 28 | 96  | core | Oscillatory zoning |
| 42 | 25.4  | 246  | 262  | 0.94 | 0.0590 | 0.0028 | 0.5777  | 0.0249 | 0.0713 | 0.0020 | 565  | 73  | 463  | 16 | 444  | 12 | 96  | core | Oscillatory zoning |
| 43 | 90.2  | 259  | 486  | 0.53 | 0.0719 | 0.0026 | 1.4950  | 0.0517 | 0.1506 | 0.0040 | 983  | 45  | 928  | 21 | 905  | 23 | 97  | core | Oscillatory zoning |
| 44 | 36.37 | 98.2 | 175  | 0.56 | 0.0703 | 0.0032 | 1.6334  | 0.0656 | 0.1683 | 0.0046 | 937  | 61  | 983  | 25 | 1003 | 26 | 98  | core | Oscillatory zoning |
| 45 | 40.1  | 386  | 406  | 0.95 | 0.0599 | 0.0024 | 0.6072  | 0.0239 | 0.0738 | 0.0020 | 600  | 62  | 482  | 15 | 459  | 12 | 95  | core | Oscillatory zoning |
| 46 | 184.0 | 123  | 1052 | 0.12 | 0.0730 | 0.0032 | 1.5664  | 0.0540 | 0.1556 | 0.0041 | 1015 | 90  | 957  | 21 | 932  | 23 | 97  | core | Oscillatory zoning |
| 47 | 40.6  | 209  | 235  | 0.89 | 0.0666 | 0.0025 | 1.1923  | 0.0417 | 0.1274 | 0.0034 | 824  | 48  | 797  | 19 | 773  | 20 | 97  | core | Oscillatory zoning |
| 48 | 101.2 | 156  | 573  | 0.27 | 0.0697 | 0.0024 | 1.4595  | 0.0477 | 0.1519 | 0.0040 | 920  | 40  | 914  | 20 | 911  | 23 | 100 | core | Oscillatory zoning |
| 49 | 77.3  | 173  | 227  | 0.76 | 0.0933 | 0.0031 | 3.3284  | 0.1083 | 0.2609 | 0.0070 | 1494 | 36  | 1488 | 25 | 1494 | 36 | 100 | core | Oscillatory zoning |
| 50 | 26.32 | 81.2 | 131  | 0.62 | 0.0706 | 0.0028 | 1.5139  | 0.0586 | 0.1583 | 0.0044 | 946  | 57  | 936  | 24 | 947  | 24 | 99  | core | Oscillatory zoning |

|    |        |      |      |      |        |        |         |        |        |        |      |     |      |    |      |    |     |      |                    |
|----|--------|------|------|------|--------|--------|---------|--------|--------|--------|------|-----|------|----|------|----|-----|------|--------------------|
| 51 | 65.0   | 693  | 672  | 1.03 | 0.0565 | 0.0021 | 0.5486  | 0.0194 | 0.0713 | 0.0019 | 473  | 52  | 444  | 13 | 444  | 12 | 100 | core | Oscillatory zoning |
| 52 | 16.44  | 99.7 | 176  | 0.57 | 0.0576 | 0.0028 | 0.6017  | 0.0274 | 0.0758 | 0.0022 | 514  | 79  | 478  | 17 | 471  | 13 | 99  | core | Oscillatory zoning |
| 53 | 67.4   | 156  | 351  | 0.45 | 0.0737 | 0.0027 | 1.6475  | 0.0567 | 0.1644 | 0.0045 | 1033 | 44  | 989  | 22 | 981  | 25 | 99  | core | Oscillatory zoning |
| 54 | 104.0  | 1204 | 953  | 1.26 | 0.0561 | 0.0021 | 0.5893  | 0.0208 | 0.0755 | 0.0020 | 456  | 52  | 470  | 13 | 469  | 12 | 100 | core | Oscillatory zoning |
| 55 | 4.91   | 7.92 | 115  | 0.07 | 0.0549 | 0.0041 | 0.2891  | 0.0204 | 0.0393 | 0.0013 | 410  | 145 | 258  | 16 | 249  | 8  | 96  | rim  | planar zoning      |
| 56 | 56.6   | 382  | 596  | 0.64 | 0.0567 | 0.0023 | 0.5869  | 0.0221 | 0.0768 | 0.0021 | 480  | 58  | 469  | 14 | 477  | 13 | 98  | core | Oscillatory zoning |
| 57 | 78.5   | 91.0 | 152  | 0.60 | 0.1635 | 0.0060 | 8.6124  | 0.2992 | 0.3905 | 0.0110 | 2492 | 35  | 2298 | 32 | 2125 | 51 | 92  | core | Oscillatory zoning |
| 58 | 123.0  | 218  | 682  | 0.32 | 0.0723 | 0.0026 | 1.5308  | 0.0527 | 0.1563 | 0.0043 | 993  | 43  | 943  | 21 | 936  | 24 | 99  | core | Oscillatory zoning |
| 59 | 52.0   | 143  | 267  | 0.54 | 0.0715 | 0.0027 | 1.5585  | 0.0558 | 0.1607 | 0.0044 | 972  | 48  | 954  | 22 | 961  | 25 | 99  | core | Oscillatory zoning |
| 60 | 37.69  | 86.7 | 272  | 0.32 | 0.0647 | 0.0025 | 1.0591  | 0.0387 | 0.1203 | 0.0033 | 763  | 52  | 733  | 19 | 732  | 19 | 100 | core | Oscillatory zoning |
| 61 | 25.96  | 211  | 291  | 0.72 | 0.0585 | 0.0027 | 0.5583  | 0.0241 | 0.0701 | 0.0019 | 549  | 74  | 450  | 16 | 437  | 12 | 97  | core | Oscillatory zoning |
| 62 | 139.49 | 93.6 | 893  | 0.10 | 0.0704 | 0.0024 | 1.3799  | 0.0468 | 0.1434 | 0.0039 | 941  | 43  | 880  | 20 | 864  | 22 | 98  | core | Oscillatory zoning |
| 63 | 70.8   | 530  | 802  | 0.66 | 0.0582 | 0.0022 | 0.5649  | 0.0209 | 0.0710 | 0.0019 | 538  | 56  | 455  | 14 | 442  | 12 | 97  | core | Oscillatory zoning |
| 64 | 13.50  | 89.9 | 75.1 | 1.20 | 0.0692 | 0.0036 | 1.1692  | 0.0562 | 0.1254 | 0.0037 | 906  | 80  | 786  | 26 | 761  | 21 | 97  | core | planar zoning      |
| 65 | 163.7  | 176  | 402  | 0.44 | 0.1159 | 0.0039 | 5.4314  | 0.1885 | 0.3415 | 0.0093 | 1893 | 40  | 1890 | 30 | 1894 | 45 | 100 | core | Oscillatory zoning |
| 66 | 71.04  | 93.5 | 389  | 0.24 | 0.0689 | 0.0025 | 1.5395  | 0.0547 | 0.1634 | 0.0044 | 895  | 49  | 946  | 22 | 975  | 24 | 97  | core | Oscillatory zoning |
| 67 | 14.18  | 118  | 149  | 0.79 | 0.0525 | 0.0030 | 0.5397  | 0.0301 | 0.0757 | 0.0023 | 306  | 110 | 438  | 20 | 470  | 14 | 93  | core | Oscillatory zoning |
| 68 | 28.63  | 101  | 237  | 0.43 | 0.0672 | 0.0031 | 0.9754  | 0.0587 | 0.0996 | 0.0042 | 845  | 92  | 691  | 30 | 612  | 25 | 88  | core | Oscillatory zoning |
| 69 | 69.5   | 275  | 411  | 0.67 | 0.0676 | 0.0026 | 1.2434  | 0.0466 | 0.1351 | 0.0037 | 857  | 54  | 820  | 21 | 817  | 21 | 100 | core | Oscillatory zoning |
| 70 | 27.40  | 197  | 271  | 0.73 | 0.0592 | 0.0027 | 0.6391  | 0.0287 | 0.0793 | 0.0022 | 575  | 79  | 502  | 18 | 492  | 13 | 98  | core | Oscillatory zoning |
| 71 | 14.36  | 37.4 | 58.8 | 0.64 | 0.0781 | 0.0041 | 2.0553  | 0.1007 | 0.1963 | 0.0060 | 1150 | 78  | 1134 | 33 | 1156 | 32 | 98  | core | Oscillatory zoning |
| 72 | 21.44  | 60.7 | 115  | 0.53 | 0.0744 | 0.0033 | 1.5309  | 0.0642 | 0.1527 | 0.0044 | 1052 | 63  | 943  | 26 | 916  | 25 | 97  | core | Oscillatory zoning |
| 73 | 238.6  | 223  | 385  | 0.58 | 0.1650 | 0.0060 | 10.6921 | 0.3721 | 0.4768 | 0.0130 | 2507 | 37  | 2497 | 32 | 2513 | 57 | 99  | core | Oscillatory zoning |
| 74 | 21.71  | 180  | 232  | 0.78 | 0.0577 | 0.0027 | 0.5758  | 0.0258 | 0.0733 | 0.0021 | 517  | 78  | 462  | 17 | 456  | 12 | 99  | core | Oscillatory zoning |
| 75 | 11.97  | 96.5 | 125  | 0.77 | 0.0595 | 0.0035 | 0.6042  | 0.0332 | 0.0741 | 0.0022 | 584  | 103 | 480  | 21 | 460  | 13 | 96  | core | Oscillatory zoning |
| 76 | 55.19  | 130  | 499  | 0.26 | 0.0630 | 0.0024 | 0.8781  | 0.0370 | 0.1014 | 0.0032 | 707  | 60  | 640  | 20 | 622  | 19 | 97  | core | Oscillatory zoning |

|                          |        |      |      |      |        |        |         |        |        |        |      |     |      |    |      |    |     |      |                    |
|--------------------------|--------|------|------|------|--------|--------|---------|--------|--------|--------|------|-----|------|----|------|----|-----|------|--------------------|
| 77                       | 177.5  | 378  | 930  | 0.41 | 0.0725 | 0.0025 | 1.6241  | 0.0542 | 0.1637 | 0.0044 | 999  | 42  | 980  | 21 | 977  | 24 | 100 | core | Oscillatory zoning |
| 78                       | 45.2   | 368  | 495  | 0.74 | 0.0562 | 0.0023 | 0.5680  | 0.0207 | 0.0721 | 0.0020 | 462  | 55  | 457  | 13 | 449  | 12 | 98  | core | Oscillatory zoning |
| 79                       | 126.1  | 139  | 204  | 0.68 | 0.1653 | 0.0060 | 10.6544 | 0.3622 | 0.4696 | 0.0127 | 2511 | 35  | 2493 | 32 | 2482 | 56 | 100 | core | Oscillatory zoning |
| 80                       | 73.0   | 319  | 768  | 0.41 | 0.0588 | 0.0023 | 0.6604  | 0.0240 | 0.0819 | 0.0022 | 558  | 54  | 515  | 15 | 507  | 13 | 98  | core | Oscillatory zoning |
| TW55: Garnet amphibolite |        |      |      |      |        |        |         |        |        |        |      |     |      |    |      |    |     |      |                    |
| 1                        | 51.58  | 17.1 | 691  | 0.02 | 0.0609 | 0.0043 | 0.5294  | 0.0316 | 0.0644 | 0.0022 | 637  | 108 | 431  | 21 | 402  | 13 | 93  | core | Oscillatory zoning |
| 2                        | 56.4   | 310  | 434  | 0.71 | 0.0614 | 0.0060 | 0.5082  | 0.0405 | 0.0666 | 0.0030 | 652  | 145 | 417  | 27 | 416  | 18 | 100 | core | Oscillatory zoning |
| 3                        | 48.2   | 180  | 531  | 0.34 | 0.0739 | 0.0178 | 0.4310  | 0.0364 | 0.0582 | 0.0032 | 1039 | 135 | 364  | 26 | 365  | 19 | 100 | core | Oscillatory zoning |
| 4                        | 1.45   | 0    | 13.2 | 0.00 | 0.0461 | 0.0169 | 0.2080  | 0.0635 | 0.0328 | 0.0066 |      | 596 | 192  | 53 | 208  | 41 | 92  | rim  | fir-tree zoning    |
| 5                        | 116.51 | 5.26 | 1750 | 0.00 | 0.0530 | 0.0055 | 0.3212  | 0.0277 | 0.0441 | 0.0026 | 328  | 146 | 283  | 21 | 278  | 16 | 98  | core | Oscillatory zoning |
| 6                        | 3.71   | 0.19 | 14.0 | 0.01 |        |        |         |        |        |        |      |     |      | 30 |      | 15 |     |      |                    |
|                          |        |      |      |      | 0.2035 | 0.0600 | 10.3296 | 3.4503 | 0.1208 | 0.0276 | 2855 | 452 | 2465 | 9  | 735  | 8  | -8  | rim  | bright rim         |
| 7                        | 9.28   | 0.99 | 178  | 0.01 | 0.2350 | 0.0594 | 1.1124  | 0.1650 | 0.0361 | 0.0034 | 3086 | 192 | 759  | 79 | 229  | 21 | -7  | rim  | bright rim         |
| 8                        | 2.00   | 0    | 8.09 | 0.00 | 0.2563 | 0.0652 | 16.4753 | 4.5598 | 0.2425 | 0.1495 | 3224 | 412 | 2905 | 26 |      | 77 |     |      |                    |
|                          |        |      |      |      |        |        |         |        |        |        |      |     |      | 5  | 1400 | 6  | 30  | rim  | bright rim         |
| 9                        | 3.57   | 0.42 | 67.4 | 0.01 |        |        |         |        |        |        |      |     |      | 16 |      |    |     |      |                    |
|                          |        |      |      |      | 0.4946 | 0.1322 | 3.7767  | 0.7920 | 0.0452 | 0.0073 | 4225 | 208 | 1588 | 8  | 285  | 45 | -39 | core | Oscillatory zoning |
| 10                       | 4.94   | 0.82 | 120  | 0.01 |        |        |         |        |        |        |      |     |      | 17 |      |    |     |      |                    |
|                          |        |      |      |      | 0.3309 | 0.0980 | 2.1113  | 0.5357 | 0.0428 | 0.0053 | 3621 | 375 | 1152 | 5  | 270  | 33 | -24 | rim  | bright rim         |
| 11                       | 52.0   | 15.2 | 67.1 | 0.23 |        |        |         |        |        |        |      |     |      | 17 |      | 26 |     |      |                    |
|                          |        |      |      |      | 0.3176 | 0.0583 | 22.3892 | 3.9504 | 0.4727 | 0.0605 | 3558 | 195 | 3201 | 1  | 2495 | 5  | 75  | core | Oscillatory zoning |
| 12                       | 22.0   | 2.27 | 134  | 0.02 |        |        |         |        |        |        |      |     |      | 17 |      |    |     |      |                    |
|                          |        |      |      |      | 0.3488 | 0.0737 | 6.5078  | 1.2784 | 0.1170 | 0.0161 | 3702 | 224 | 2047 | 3  | 713  | 93 | 3   | rim  | bright rim         |
| 13                       | 49.5   | 3.04 | 119  | 0.03 |        |        |         |        |        |        |      |     |      | 15 |      | 17 |     |      |                    |
|                          |        |      |      |      | 0.5334 | 0.0918 | 16.7420 | 2.7354 | 0.2215 | 0.0329 | 4336 | 102 | 2920 | 7  | 1290 | 4  | 23  | rim  | bright rim         |
| 14                       | 25.42  | 5.02 | 427  | 0.01 | 0.0973 | 0.0834 | 0.4864  | 0.4111 | 0.0363 | 0.0053 | 1573 | 164 | 402  | 28 | 230  | 33 | 46  | core | Oscillatory zoning |

|    |        |      |      |      |        |        |        |        |        |        |      | 7   | 1    |    |      |    |     |      |                    |
|----|--------|------|------|------|--------|--------|--------|--------|--------|--------|------|-----|------|----|------|----|-----|------|--------------------|
| 15 | 104.35 | 9.19 | 2383 | 0.00 | 0.0619 | 0.0069 | 0.3211 | 0.0344 | 0.0383 | 0.0016 | 671  | 219 | 283  | 26 | 242  | 10 | 84  | core | Oscillatory zoning |
| 16 | 38.24  | 16.8 | 941  | 0.02 | 0.0584 | 0.0109 | 0.2622 | 0.0468 | 0.0325 | 0.0018 | 546  | 399 | 236  | 38 | 206  | 11 | 86  | core | Oscillatory zoning |
| 17 | 4.460  | 0.12 | 42.0 | 0.00 | 0.0610 | 0.0060 | 0.4246 | 0.0403 | 0.0533 | 0.0020 | 639  | 194 | 359  | 29 | 335  | 12 | 93  | rim  | bright rim         |
| 18 | 25.6   | 145  | 141  | 1.03 | 0.0660 | 0.0032 | 1.1819 | 0.0561 | 0.1315 | 0.0038 | 807  | 80  | 792  | 26 | 797  | 22 | 99  | core | Oscillatory zoning |
| 19 | 72.48  | 29.2 | 1210 | 0.02 | 0.0520 | 0.0021 | 0.4045 | 0.0150 | 0.0574 | 0.0016 | 285  | 58  | 345  | 11 | 360  | 10 | 96  | core | Oscillatory zoning |
| 20 | 43.44  | 24.3 | 703  | 0.03 | 0.0538 | 0.0022 | 0.4273 | 0.0167 | 0.0587 | 0.0016 | 361  | 63  | 361  | 12 | 367  | 10 | 98  | core | Oscillatory zoning |
| 21 | 31.11  | 102  | 193  | 0.53 | 0.0683 | 0.0030 | 1.1848 | 0.0470 | 0.1299 | 0.0037 | 877  | 59  | 794  | 22 | 787  | 21 | 99  | core | Oscillatory zoning |
| 22 | 14.73  | 47.9 | 91.3 | 0.53 | 0.0619 | 0.0032 | 1.0804 | 0.0518 | 0.1310 | 0.0038 | 670  | 83  | 744  | 25 | 794  | 22 | 93  | core | Oscillatory zoning |
| 23 | 77.1   | 438  | 429  | 1.02 | 0.0628 | 0.0026 | 1.1103 | 0.0403 | 0.1292 | 0.0036 | 701  | 51  | 758  | 19 | 783  | 21 | 97  | core | Oscillatory zoning |
| 24 | 30.84  | 210  | 358  | 0.59 | 0.0578 | 0.0028 | 0.5351 | 0.0228 | 0.0693 | 0.0020 | 523  | 71  | 435  | 15 | 432  | 12 | 99  | core | Oscillatory zoning |
| 25 | 18.14  | 35.3 | 117  | 0.30 | 0.0708 | 0.0039 | 1.2288 | 0.0597 | 0.1322 | 0.0041 | 953  | 79  | 814  | 27 | 800  | 23 | 98  | core | Oscillatory zoning |
| 26 | 4.41   | 0.58 | 50.6 | 0.01 | 0.0645 | 0.0168 | 0.4770 | 0.1226 | 0.0536 | 0.0024 | 759  | 547 | 396  | 84 | 337  | 14 | 84  | rim  | bright rim         |
| 27 | 24.50  | 4.05 | 375  | 0.01 | 0.0554 | 0.0025 | 0.4730 | 0.0211 | 0.0634 | 0.0018 | 429  | 78  | 393  | 15 | 396  | 11 | 99  | core | Oscillatory zoning |
| 28 | 138.8  | 205  | 326  | 0.63 | 0.1145 | 0.0040 | 5.1336 | 0.1709 | 0.3323 | 0.0092 | 1871 | 34  | 1842 | 28 | 1849 | 44 | 100 | core | Oscillatory zoning |
| 29 | 5.72   | 0.38 | 100  | 0.00 | 0.0580 | 0.0042 | 0.4207 | 0.0277 | 0.0526 | 0.0016 | 530  | 163 | 357  | 20 | 330  | 10 | 92  | rim  | bright rim         |
| 30 | 23.26  | 185  | 249  | 0.74 | 0.0580 | 0.0027 | 0.5708 | 0.0262 | 0.0723 | 0.0021 | 529  | 80  | 459  | 17 | 450  | 13 | 98  | core | Oscillatory zoning |
| 31 | 3.196  | 0.81 | 54.7 | 0.01 | 0.0611 | 0.0060 | 0.4432 | 0.0411 | 0.0526 | 0.0018 | 644  | 220 | 372  | 29 | 330  | 11 | 88  | rim  | bright rim         |
| 32 | 69.3   | 105  | 154  | 0.68 | 0.1195 | 0.0042 | 5.6457 | 0.1966 | 0.3447 | 0.0095 | 1949 | 39  | 1923 | 30 | 1909 | 46 | 99  | core | Oscillatory zoning |
| 33 | 51.0   | 294  | 572  | 0.51 | 0.0602 | 0.0024 | 0.6055 | 0.0230 | 0.0728 | 0.0020 | 609  | 58  | 481  | 15 | 453  | 12 | 94  | core | Oscillatory zoning |
| 34 | 43.34  | 158  | 468  | 0.34 | 0.0562 | 0.0036 | 0.5890 | 0.0335 | 0.0761 | 0.0022 | 458  | 145 | 470  | 21 | 473  | 13 | 99  | core | Oscillatory zoning |
| 35 | 10.075 | 0.88 | 86.3 | 0.01 | 0.0545 | 0.0041 | 0.4084 | 0.0279 | 0.0551 | 0.0017 | 392  | 140 | 348  | 20 | 346  | 11 | 99  | core | Oscillatory zoning |
| 36 | 71.1   | 270  | 623  | 0.43 | 0.0776 | 0.0104 | 0.8023 | 0.1035 | 0.0750 | 0.0026 | 1136 | 281 | 598  | 58 | 466  | 16 | 75  | core | Oscillatory zoning |
| 37 | 43.0   | 72.3 | 172  | 0.42 | 0.0867 | 0.0032 | 2.7715 | 0.1321 | 0.2260 | 0.0080 | 1353 | 63  | 1348 | 36 | 1313 | 42 | 97  | core | Oscillatory zoning |
| 38 | 76.18  | 3.07 | 1183 | 0.00 | 0.0558 | 0.0019 | 0.4747 | 0.0159 | 0.0616 | 0.0017 | 445  | 45  | 394  | 11 | 385  | 10 | 98  | core | Oscillatory zoning |
| 39 | 147.2  | 199  | 356  | 0.56 | 0.1187 | 0.0038 | 5.4023 | 0.1720 | 0.3294 | 0.0089 | 1937 | 31  | 1885 | 27 | 1836 | 43 | 97  | core | Oscillatory zoning |



|                                     |       |      |      |      |        |        |        |        |        |        |      |     |      |    |      |    |     |      |                    |
|-------------------------------------|-------|------|------|------|--------|--------|--------|--------|--------|--------|------|-----|------|----|------|----|-----|------|--------------------|
| 40                                  | 151.8 | 120  | 402  | 0.30 | 0.1177 | 0.0037 | 5.1257 | 0.1622 | 0.3156 | 0.0085 | 1921 | 31  | 1840 | 27 | 1768 | 41 | 96  | core | Oscillatory zoning |
| TW61: Garnet staurolite mica schist |       |      |      |      |        |        |        |        |        |        |      |     |      |    |      |    |     |      |                    |
| 1                                   | 85.8  | 459  | 1005 | 0.46 | 0.0539 | 0.0021 | 0.5344 | 0.0198 | 0.0714 | 0.0020 | 367  | 57  | 435  | 13 | 444  | 12 | 98  | core | Oscillatory zoning |
| 2                                   | 71.8  | 663  | 750  | 0.88 | 0.0624 | 0.0025 | 0.6080 | 0.0229 | 0.0703 | 0.0019 | 686  | 57  | 482  | 14 | 438  | 12 | 90  | core | Oscillatory zoning |
| 3                                   | 65.83 | 83.4 | 372  | 0.22 | 0.0669 | 0.0028 | 1.4441 | 0.0536 | 0.1539 | 0.0042 | 834  | 53  | 907  | 22 | 923  | 24 | 98  | core | Oscillatory zoning |
| 4                                   | 122.1 | 185  | 589  | 0.31 | 0.0756 | 0.0026 | 1.8843 | 0.0672 | 0.1798 | 0.0051 | 1084 | 44  | 1076 | 24 | 1066 | 28 | 99  | core | Oscillatory zoning |
| 5                                   | 70.7  | 323  | 340  | 0.95 | 0.0642 | 0.0026 | 1.3168 | 0.0502 | 0.1484 | 0.0041 | 748  | 57  | 853  | 22 | 892  | 23 | 96  | core | Oscillatory zoning |
| 6                                   | 16.89 | 115  | 91.8 | 1.25 | 0.0668 | 0.0035 | 1.1880 | 0.0629 | 0.1288 | 0.0039 | 831  | 93  | 795  | 29 | 781  | 22 | 98  | core | fir-tree zoning    |
| 7                                   | 8.75  | 81.3 | 92.0 | 0.88 | 0.0567 | 0.0036 | 0.5328 | 0.0310 | 0.0693 | 0.0022 | 481  | 112 | 434  | 21 | 432  | 13 | 100 | core | fir-tree zoning    |
| 8                                   | 7.41  | 45.7 | 38.6 | 1.18 | 0.0705 | 0.0055 | 1.2726 | 0.0887 | 0.1296 | 0.0045 | 942  | 128 | 834  | 40 | 785  | 25 | 94  | core | fir-tree zoning    |
| 9                                   | 25.8  | 232  | 261  | 0.89 | 0.0618 | 0.0030 | 0.6362 | 0.0298 | 0.0728 | 0.0021 | 666  | 81  | 500  | 18 | 453  | 13 | 90  | core | Oscillatory zoning |
| 10                                  | 31.83 | 241  | 371  | 0.65 | 0.0568 | 0.0026 | 0.5408 | 0.0241 | 0.0691 | 0.0019 | 482  | 78  | 439  | 16 | 430  | 12 | 98  | core | Oscillatory zoning |
| 11                                  | 18.38 | 124  | 202  | 0.62 | 0.0611 | 0.0029 | 0.6157 | 0.0285 | 0.0736 | 0.0022 | 644  | 79  | 487  | 18 | 458  | 13 | 94  | core | Oscillatory zoning |
| 12                                  | 53.33 | 75.0 | 248  | 0.30 | 0.0789 | 0.0030 | 2.0162 | 0.0744 | 0.1849 | 0.0051 | 1168 | 50  | 1121 | 25 | 1093 | 28 | 97  | core | Oscillatory zoning |
| 13                                  | 72.7  | 110  | 133  | 0.82 | 0.1608 | 0.0059 | 9.1714 | 0.3782 | 0.4069 | 0.0134 | 2464 | 43  | 2355 | 38 | 2200 | 61 | 93  | core | Oscillatory zoning |
| 14                                  | 74.9  | 364  | 878  | 0.42 | 0.0554 | 0.0022 | 0.5593 | 0.0204 | 0.0729 | 0.0020 | 427  | 56  | 451  | 13 | 453  | 12 | 100 | core | Oscillatory zoning |
| 15                                  | 24.69 | 205  | 273  | 0.75 | 0.0607 | 0.0059 | 0.5791 | 0.0533 | 0.0692 | 0.0021 | 630  | 217 | 464  | 34 | 431  | 13 | 93  | core | Oscillatory zoning |
| 16                                  | 36.0  | 577  | 338  | 1.71 | 0.0587 | 0.0027 | 0.5545 | 0.0234 | 0.0685 | 0.0019 | 556  | 70  | 448  | 15 | 427  | 12 | 95  | core | Oscillatory zoning |
| 17                                  | 20.03 | 147  | 217  | 0.68 | 0.0627 | 0.0066 | 0.6178 | 0.0623 | 0.0715 | 0.0022 | 697  | 235 | 488  | 39 | 445  | 13 | 91  | core | Oscillatory zoning |
| 18                                  | 10.10 | 111  | 106  | 1.05 | 0.0580 | 0.0039 | 0.5432 | 0.0345 | 0.0688 | 0.0021 | 528  | 126 | 440  | 23 | 429  | 12 | 97  | core | fir-tree zoning    |
| 19                                  | 29.34 | 66.2 | 152  | 0.44 | 0.0737 | 0.0034 | 1.6170 | 0.0600 | 0.1602 | 0.0045 | 1033 | 51  | 977  | 23 | 958  | 25 | 98  | core | Oscillatory zoning |
| 20                                  | 36.8  | 469  | 393  | 1.19 | 0.0569 | 0.0025 | 0.5289 | 0.0221 | 0.0674 | 0.0019 | 489  | 71  | 431  | 15 | 421  | 11 | 98  | core | Oscillatory zoning |
| 21                                  | 48.6  | 319  | 578  | 0.55 | 0.0568 | 0.0021 | 0.5472 | 0.0193 | 0.0698 | 0.0019 | 482  | 52  | 443  | 13 | 435  | 11 | 98  | core | Oscillatory zoning |
| 22                                  | 51.7  | 234  | 603  | 0.39 | 0.0565 | 0.0021 | 0.5751 | 0.0201 | 0.0737 | 0.0020 | 472  | 51  | 461  | 13 | 459  | 12 | 100 | core | Oscillatory zoning |
| 23                                  | 20.79 | 146  | 223  | 0.66 | 0.0551 | 0.0026 | 0.5717 | 0.0253 | 0.0753 | 0.0021 | 416  | 78  | 459  | 16 | 468  | 13 | 98  | core | Oscillatory zoning |
| 24                                  | 99.4  | 876  | 474  | 1.85 | 0.0641 | 0.0024 | 1.1760 | 0.0403 | 0.1326 | 0.0036 | 745  | 46  | 789  | 19 | 803  | 20 | 98  | core | Oscillatory zoning |

|    |        |      |      |      |        |        |        |        |        |        |      |     |      |    |      |    |     |      |                    |
|----|--------|------|------|------|--------|--------|--------|--------|--------|--------|------|-----|------|----|------|----|-----|------|--------------------|
| 25 | 69.6   | 120  | 259  | 0.46 | 0.0839 | 0.0030 | 2.5544 | 0.0883 | 0.2210 | 0.0060 | 1289 | 43  | 1288 | 25 | 1287 | 32 | 100 | core | Oscillatory zoning |
| 26 | 12.32  | 107  | 142  | 0.75 | 0.0625 | 0.0079 | 0.5586 | 0.0686 | 0.0649 | 0.0021 | 690  | 284 | 451  | 45 | 405  | 13 | 89  | core | fir-tree zoning    |
| 27 | 59.8   | 185  | 157  | 1.18 | 0.0985 | 0.0034 | 3.6246 | 0.1233 | 0.2680 | 0.0072 | 1595 | 40  | 1555 | 27 | 1530 | 37 | 98  | core | Oscillatory zoning |
| 28 | 38.78  | 169  | 478  | 0.35 | 0.0545 | 0.0023 | 0.5278 | 0.0200 | 0.0704 | 0.0019 | 391  | 61  | 430  | 13 | 439  | 11 | 98  | core | Oscillatory zoning |
| 29 | 22.1   | 178  | 114  | 1.55 | 0.0623 | 0.0032 | 1.0982 | 0.0509 | 0.1291 | 0.0037 | 686  | 80  | 752  | 25 | 783  | 21 | 96  | core | Oscillatory zoning |
| 30 | 10.32  | 76.3 | 54.0 | 1.41 | 0.0663 | 0.0040 | 1.1432 | 0.0643 | 0.1288 | 0.0038 | 815  | 103 | 774  | 30 | 781  | 22 | 99  | core | Oscillatory zoning |
| 31 | 61.67  | 54.8 | 394  | 0.14 | 0.0682 | 0.0028 | 1.3397 | 0.0498 | 0.1407 | 0.0038 | 875  | 54  | 863  | 22 | 848  | 22 | 98  | core | Oscillatory zoning |
| 32 | 68.7   | 210  | 448  | 0.47 | 0.0670 | 0.0032 | 1.1387 | 0.0472 | 0.1249 | 0.0035 | 837  | 65  | 772  | 22 | 759  | 20 | 98  | core | Oscillatory zoning |
| 33 | 26.6   | 282  | 283  | 1.00 | 0.0558 | 0.0027 | 0.5352 | 0.0235 | 0.0706 | 0.0020 | 444  | 77  | 435  | 16 | 439  | 12 | 99  | core | Oscillatory zoning |
| 34 | 24.93  | 181  | 253  | 0.72 | 0.0627 | 0.0029 | 0.6699 | 0.0285 | 0.0790 | 0.0022 | 698  | 70  | 521  | 17 | 490  | 13 | 94  | core | Oscillatory zoning |
| 35 | 106.99 | 64.4 | 647  | 0.10 | 0.0722 | 0.0027 | 1.5098 | 0.0537 | 0.1529 | 0.0041 | 992  | 49  | 934  | 22 | 917  | 23 | 98  | core | Oscillatory zoning |
| 36 | 140.4  | 102  | 293  | 0.35 | 0.1597 | 0.0057 | 8.4783 | 0.2964 | 0.3875 | 0.0106 | 2452 | 37  | 2284 | 32 | 2111 | 49 | 92  | core | Oscillatory zoning |
| 37 | 19.65  | 133  | 225  | 0.59 | 0.0544 | 0.0028 | 0.5407 | 0.0248 | 0.0711 | 0.0020 | 387  | 83  | 439  | 16 | 443  | 12 | 99  | core | Oscillatory zoning |
| 38 | 4.06   | 7.74 | 23.9 | 0.32 | 0.0711 | 0.0053 | 1.3918 | 0.1018 | 0.1476 | 0.0053 | 961  | 134 | 885  | 43 | 888  | 30 | 100 | core | Oscillatory zoning |
| 39 | 55.9   | 97.1 | 159  | 0.61 | 0.0979 | 0.0037 | 3.8175 | 0.1411 | 0.2837 | 0.0078 | 1584 | 48  | 1596 | 30 | 1610 | 39 | 99  | core | Oscillatory zoning |
| 40 | 21.10  | 97.1 | 98.7 | 0.98 | 0.0727 | 0.0033 | 1.5821 | 0.0704 | 0.1590 | 0.0046 | 1006 | 71  | 963  | 28 | 951  | 25 | 99  | core | Oscillatory zoning |
| 41 | 21.78  | 120  | 196  | 0.61 | 0.0549 | 0.0029 | 0.6929 | 0.0331 | 0.0902 | 0.0028 | 407  | 84  | 535  | 20 | 557  | 16 | 96  | core | planar zoning      |
| 42 | 29.82  | 222  | 327  | 0.68 | 0.0543 | 0.0025 | 0.5333 | 0.0229 | 0.0711 | 0.0021 | 382  | 72  | 434  | 15 | 443  | 12 | 98  | core | fir-tree zoning    |
| 43 | 32.7   | 371  | 334  | 1.11 | 0.0513 | 0.0076 | 0.4725 | 0.0680 | 0.0668 | 0.0022 | 256  | 307 | 393  | 47 | 417  | 14 | 94  | core | Oscillatory zoning |
| 44 | 40.3   | 168  | 441  | 0.38 | 0.0689 | 0.0052 | 0.6024 | 0.0339 | 0.0678 | 0.0026 | 895  | 88  | 479  | 21 | 423  | 15 | 88  | core | Oscillatory zoning |
| 45 | 27.4   | 63.8 | 81.0 | 0.79 | 0.0850 | 0.0127 | 2.1777 | 0.3077 | 0.1857 | 0.0093 | 1317 | 310 | 1174 | 98 | 1098 | 50 | 93  | core | Oscillatory zoning |
| 46 | 289    | 1477 | 1276 | 1.16 | 0.0745 | 0.0025 | 1.6419 | 0.0553 | 0.1587 | 0.0043 | 1055 | 41  | 986  | 21 | 949  | 24 | 96  | core | Oscillatory zoning |
| 47 | 101.8  | 1109 | 1039 | 1.07 | 0.0570 | 0.0070 | 0.5147 | 0.0609 | 0.0655 | 0.0021 | 493  | 279 | 422  | 41 | 409  | 12 | 97  | core | Oscillatory zoning |
| 48 | 153    | 267  | 227  | 1.18 |        |        |        |        |        |        |      | 352 |      | 77 |      | 24 | -7  | core | Oscillatory zoning |
| 49 | 28.4   | 122  | 142  | 0.86 | 0.0728 | 0.0044 | 1.4486 | 0.0801 | 0.1451 | 0.0043 | 1009 | 97  | 909  | 33 | 873  | 24 | 96  | core | Oscillatory zoning |

|    |       |      |     |      |        |        |        |        |        |        |      |     |      |    |     |    |     |      |                    |
|----|-------|------|-----|------|--------|--------|--------|--------|--------|--------|------|-----|------|----|-----|----|-----|------|--------------------|
| 50 | 47.0  | 292  | 391 | 0.75 |        |        |        |        |        |        |      |     |      | 10 |     |    |     |      |                    |
|    |       |      |     |      | 0.0558 | 0.0162 | 0.5720 | 0.1646 | 0.0744 | 0.0031 | 443  | 547 | 459  | 6  | 463 | 18 | 99  | core | Oscillatory zoning |
| 51 | 21.0  | 153  | 121 | 1.27 | 0.0652 | 0.0032 | 1.0543 | 0.0520 | 0.1180 | 0.0035 | 779  | 85  | 731  | 26 | 719 | 20 | 98  | core | Oscillatory zoning |
| 52 | 36.0  | 324  | 395 | 0.82 | 0.0565 | 0.0023 | 0.5337 | 0.0214 | 0.0687 | 0.0019 | 471  | 66  | 434  | 14 | 429 | 11 | 99  | core | Oscillatory zoning |
| 53 | 51.3  | 285  | 481 | 0.59 | 0.0583 | 0.0128 | 0.5605 | 0.1210 | 0.0697 | 0.0026 | 542  | 454 | 452  | 79 | 434 | 16 | 96  | core | Oscillatory zoning |
| 54 | 44.27 | 199  | 540 | 0.37 | 0.0604 | 0.0023 | 0.5751 | 0.0216 | 0.0693 | 0.0019 | 618  | 57  | 461  | 14 | 432 | 11 | 94  | core | Oscillatory zoning |
| 55 | 78.0  | 561  | 802 | 0.70 | 0.0563 | 0.0022 | 0.5976 | 0.0213 | 0.0771 | 0.0021 | 465  | 53  | 476  | 14 | 479 | 12 | 99  | core | Oscillatory zoning |
| 56 | 73.1  | 454  | 861 | 0.53 | 0.0598 | 0.0024 | 0.5705 | 0.0213 | 0.0695 | 0.0019 | 596  | 56  | 458  | 14 | 433 | 12 | 94  | core | Oscillatory zoning |
| 57 | 93.5  | 784  | 885 | 0.89 | 0.0549 | 0.0020 | 0.5989 | 0.0211 | 0.0791 | 0.0022 | 410  | 51  | 477  | 13 | 491 | 13 | 97  | core | Oscillatory zoning |
| 58 | 31.1  | 282  | 323 | 0.87 | 0.0498 | 0.0025 | 0.4927 | 0.0223 | 0.0724 | 0.0020 | 187  | 85  | 407  | 15 | 451 | 12 | 90  | core | Oscillatory zoning |
| 59 | 78.26 | 109  | 458 | 0.24 | 0.0697 | 0.0025 | 1.4526 | 0.0497 | 0.1509 | 0.0041 | 920  | 43  | 911  | 21 | 906 | 23 | 99  | core | Oscillatory zoning |
| 60 | 49.0  | 419  | 531 | 0.79 | 0.0615 | 0.0025 | 0.5798 | 0.0210 | 0.0684 | 0.0018 | 657  | 53  | 464  | 13 | 426 | 11 | 91  | core | Oscillatory zoning |
| 61 | 22.6  | 117  | 159 | 0.74 | 0.1666 | 0.0119 | 2.1725 | 0.1595 | 0.0935 | 0.0035 | 2523 | 109 | 1172 | 51 | 576 | 20 | 32  | core | Oscillatory zoning |
| 62 | 21.6  | 139  | 182 | 0.77 |        |        |        |        |        |        |      |     |      | 14 |     |    |     |      |                    |
|    |       |      |     |      | 0.0693 | 0.0237 | 0.7064 | 0.2394 | 0.0740 | 0.0037 | 907  | 708 | 543  | 2  | 460 | 22 | 83  | core | fir-tree zoning    |
| 63 | 55.3  | 441  | 586 | 0.75 | 0.0573 | 0.0021 | 0.5758 | 0.0221 | 0.0725 | 0.0020 | 501  | 59  | 462  | 14 | 451 | 12 | 98  | core | Oscillatory zoning |
| 64 | 20.9  | 199  | 102 | 1.95 | 0.0669 | 0.0033 | 1.1089 | 0.0514 | 0.1212 | 0.0036 | 835  | 75  | 758  | 25 | 737 | 21 | 97  | core | Oscillatory zoning |
| 65 | 41.9  | 233  | 128 | 1.83 |        |        |        |        |        |        |      |     |      | 23 |     |    |     |      |                    |
|    |       |      |     |      | 0.1046 | 0.0401 | 1.5361 | 0.5817 | 0.1066 | 0.0066 | 1706 | 885 | 945  | 3  | 653 | 39 | 63  | core | Oscillatory zoning |
| 66 | 26.4  | 214  | 211 | 1.02 | 0.0750 | 0.0147 | 0.6930 | 0.1331 | 0.0670 | 0.0025 | 1068 | 433 | 535  | 80 | 418 | 15 | 75  | core | Oscillatory zoning |
| 67 | 84.4  | 457  | 509 | 0.90 | 0.0631 | 0.0023 | 1.0573 | 0.0352 | 0.1213 | 0.0033 | 712  | 43  | 733  | 17 | 738 | 19 | 99  | core | Oscillatory zoning |
| 68 | 36.9  | 111  | 225 | 0.50 | 0.0665 | 0.0057 | 1.1605 | 0.0925 | 0.1265 | 0.0038 | 823  | 184 | 782  | 43 | 768 | 22 | 98  | core | Oscillatory zoning |
| 69 | 53.3  | 279  | 390 | 0.72 | 0.0655 | 0.0147 | 0.7044 | 0.1556 | 0.0780 | 0.0029 | 790  | 478 | 541  | 93 | 484 | 17 | 89  | core | Oscillatory zoning |
| 70 | 60.6  | 91.3 | 315 | 0.29 | 0.0714 | 0.0029 | 1.5854 | 0.0546 | 0.1621 | 0.0046 | 968  | 41  | 964  | 21 | 968 | 26 | 100 | core | Oscillatory zoning |
| 71 | 18.49 | 157  | 184 | 0.85 | 0.0583 | 0.0030 | 0.5797 | 0.0285 | 0.0730 | 0.0021 | 541  | 90  | 464  | 18 | 454 | 13 | 98  | core | Oscillatory zoning |
| 72 | 55.0  | 161  | 293 | 0.55 | 0.0657 | 0.0026 | 1.3621 | 0.0486 | 0.1515 | 0.0043 | 796  | 47  | 873  | 21 | 909 | 24 | 96  | core | Oscillatory zoning |

|                         |        |      |      |      |        |        |         |        |        |        |      |     |      |    |      |    |     |      |                    |
|-------------------------|--------|------|------|------|--------|--------|---------|--------|--------|--------|------|-----|------|----|------|----|-----|------|--------------------|
| 73                      | 25.90  | 199  | 271  | 0.73 | 0.0607 | 0.0030 | 0.5971  | 0.0280 | 0.0723 | 0.0021 | 629  | 82  | 475  | 18 | 450  | 13 | 95  | core | Oscillatory zoning |
| 74                      | 73.0   | 218  | 653  | 0.33 | 0.1234 | 0.0445 | 1.5542  | 0.5426 | 0.0914 | 0.0084 | 2006 | 818 | 952  | 6  | 564  | 50 | 49  | core | Oscillatory zoning |
| 75                      | 139.9  | 245  | 672  | 0.36 | 0.0736 | 0.0025 | 1.7166  | 0.0543 | 0.1667 | 0.0046 | 1030 | 33  | 1015 | 20 | 994  | 25 | 98  | core | Oscillatory zoning |
| 76                      | 35.0   | 330  | 344  | 0.96 | 0.0648 | 0.0038 | 0.6532  | 0.0382 | 0.0733 | 0.0021 | 769  | 111 | 510  | 23 | 456  | 12 | 89  | core | Oscillatory zoning |
| 77                      | 36.4   | 241  | 371  | 0.65 | 0.0557 | 0.0024 | 0.5910  | 0.0230 | 0.0779 | 0.0022 | 439  | 62  | 472  | 15 | 484  | 13 | 97  | core | Oscillatory zoning |
| 78                      | 123.8  | 276  | 1518 | 0.18 | 0.0572 | 0.0019 | 0.5709  | 0.0182 | 0.0727 | 0.0019 | 498  | 39  | 459  | 12 | 453  | 12 | 99  | core | Oscillatory zoning |
| 79                      | 89.3   | 145  | 430  | 0.34 | 0.0821 | 0.0027 | 1.9596  | 0.0643 | 0.1740 | 0.0050 | 1248 | 32  | 1102 | 22 | 1034 | 27 | 94  | core | Oscillatory zoning |
| 80                      | 78.9   | 377  | 923  | 0.41 | 0.0575 | 0.0020 | 0.5750  | 0.0194 | 0.0728 | 0.0020 | 509  | 44  | 461  | 12 | 453  | 12 | 98  | core | Oscillatory zoning |
| TW68: Hornblende schist |        |      |      |      |        |        |         |        |        |        |      |     |      |    |      |    |     |      |                    |
| 1                       | 110.1  | 175  | 108  | 1.62 | 0.2373 | 0.0096 | 20.5779 | 0.8099 | 0.6242 | 0.0183 | 3102 | 43  | 3119 | 38 | 3127 | 73 | 100 | core | Oscillatory zoning |
| 2                       | 271.7  | 394  | 395  | 1.00 | 0.1909 | 0.0073 | 12.9191 | 0.4761 | 0.4852 | 0.0135 | 2750 | 41  | 2674 | 35 | 2550 | 59 | 95  | core | fir-tree zoning    |
| 3                       | 7.65   | 0.90 | 125  | 0.01 | 0.0557 | 0.0041 | 0.4468  | 0.0304 | 0.0592 | 0.002  | 440  | 135 | 375  | 21 | 371  | 12 | 99  | core | Oscillatory zoning |
| 4                       | 316.6  | 411  | 544  | 0.76 | 0.1667 | 0.0064 | 10.1776 | 0.3825 | 0.4373 | 0.0124 | 2525 | 43  | 2451 | 35 | 2339 | 56 | 95  | core | Oscillatory zoning |
| 5                       | 20.43  | 158  | 225  | 0.70 | 0.0517 | 0.0031 | 0.5386  | 0.0297 | 0.0716 | 0.0022 | 272  | 108 | 438  | 20 | 446  | 13 | 98  | core | Oscillatory zoning |
| 6                       | 34.84  | 28.6 | 336  | 0.09 | 0.0631 | 0.0033 | 0.8883  | 0.0488 | 0.1006 | 0.0032 | 712  | 97  | 645  | 26 | 618  | 19 | 96  | core | Oscillatory zoning |
| 7                       | 81.8   | 548  | 546  | 1.00 | 0.0647 | 0.0031 | 1.0072  | 0.0458 | 0.1117 | 0.0033 | 765  | 74  | 707  | 23 | 683  | 19 | 97  | core | Oscillatory zoning |
| 8                       | 299.74 | 16.2 | 4771 | 0.00 | 0.0573 | 0.0027 | 0.4935  | 0.0221 | 0.0615 | 0.0018 | 503  | 76  | 407  | 15 | 385  | 11 | 94  | core | Oscillatory zoning |
| 9                       | 1.9135 | 0.15 | 29.6 | 0.01 | 0.0964 | 0.0139 | 0.7192  | 0.097  | 0.064  | 0.0031 | 1556 | 248 | 550  | 57 | 400  | 19 | 68  | core | fir-tree zoning    |
| 10                      | 140.6  | 140  | 768  | 0.18 | 0.0792 | 0.0048 | 1.79621 | 0.0866 | 0.1644 | 0.0048 | 1178 | 115 | 1044 | 31 | 981  | 27 | 94  | core | Oscillatory zoning |
| 11                      | 27.6   | 1663 | 857  | 1.94 | 0.0538 | 0.0033 | 0.1492  | 0.0085 | 0.0201 | 0.0006 | 363  | 112 | 141  | 8  | 128  | 4  | 90  | core | Oscillatory zoning |
| 12                      | 24.49  | 104  | 281  | 0.37 | 0.0599 | 0.0036 | 0.6415  | 0.0325 | 0.0735 | 0.0022 | 600  | 91  | 503  | 20 | 457  | 13 | 90  | core | Oscillatory zoning |
| 13                      | 86.2   | 91.7 | 131  | 0.70 | 0.1733 | 0.0071 | 12.4967 | 0.4771 | 0.5148 | 0.0147 | 2590 | 43  | 2642 | 36 | 2677 | 63 | 99  | core | Oscillatory zoning |
| 14                      | 301.1  | 161  | 380  | 0.42 | 0.2335 | 0.0092 | 20.6333 | 0.7654 | 0.629  | 0.018  | 3076 | 39  | 3122 | 36 | 3146 | 71 | 99  | core | Oscillatory zoning |
| 15                      | 3.05   | 5.56 | 50.6 | 0.11 | 0.0589 | 0.0125 | 0.4072  | 0.0707 | 0.0557 | 0.0023 | 563  | 377 | 347  | 51 | 349  | 14 | 99  | core | fir-tree zoning    |
| 16                      | 44.18  | 1.99 | 680  | 0.00 | 0.0559 | 0.0028 | 0.5143  | 0.0234 | 0.066  | 0.0019 | 448  | 79  | 421  | 16 | 412  | 11 | 98  | core | Oscillatory zoning |
