# Supplementary material
Source: MDPI journal article supplement (https://www.mdpi.com/2075-163X/12/8/1026)
Supplement: s1 [file s1]

**Table S2.** Chemical composition of the metamorphic the metasedimentary and meta-igneous rocks from the Wuguan Complex and Liuling Group. The oxides of the major elements are given in %, and the content of trace elements is given in ppm.

| Sample                         | GQ20    | GQ23    | GQ25    | GQ27    | GQ29    | TW43    | TW44    | TW53   | TW54   | TW55   | TW56   | TW58   | TW61   | TW68   |
|--------------------------------|---------|---------|---------|---------|---------|---------|---------|--------|--------|--------|--------|--------|--------|--------|
| Affiliation                    | Liuling | Wuguan |
| Al <sub>2</sub> O <sub>3</sub> | 14.88   | 17.09   | 20.28   | 10.17   | 9.85    | 16.91   | 16.74   | 14.24  | 13.01  | 14.52  | 12.67  | 12.87  | 20.96  | 12.46  |
| CaO                            | 5.04    | 4.15    | 0.36    | 3.52    | 10.42   | 0.33    | 0.71    | 2.59   | 9.77   | 5.74   | 9.22   | 7.98   | 0.57   | 8.87   |
| Fe <sub>2</sub> O <sub>3</sub> | 6.14    | 7.54    | 8.34    | 4.03    | 3.91    | 5.21    | 6.63    | 5.46   | 14.73  | 6.93   | 15.33  | 15.63  | 7.89   | 14.14  |
| K <sub>2</sub> O               | 3.00    | 2.36    | 7.67    | 1.76    | 1.99    | 4.70    | 4.65    | 2.33   | 1.04   | 2.15   | 0.74   | 1.06   | 2.67   | 0.68   |
| MgO                            | 3.80    | 4.95    | 3.15    | 2.34    | 2.68    | 3.01    | 3.06    | 2.88   | 5.41   | 4.45   | 5.24   | 4.50   | 2.72   | 5.30   |
| MnO                            | 0.08    | 0.08    | 0.04    | 0.06    | 0.07    | 0.03    | 0.09    | 0.06   | 0.22   | 0.13   | 0.26   | 0.24   | 0.06   | 0.18   |
| Na <sub>2</sub> O              | 2.73    | 3.69    | 0.24    | 0.56    | 1.30    | 0.79    | 0.74    | 3.16   | 2.65   | 1.90   | 2.61   | 3.18   | 0.64   | 2.66   |
| P <sub>2</sub> O <sub>5</sub>  | 0.15    | 0.15    | 0.19    | 0.15    | 0.11    | 0.19    | 0.14    | 0.15   | 0.48   | 0.13   | 0.54   | 0.56   | 0.16   | 0.40   |
| TiO <sub>2</sub>               | 0.68    | 0.75    | 0.89    | 0.53    | 0.59    | 0.80    | 0.71    | 0.75   | 2.96   | 0.67   | 3.46   | 3.43   | 0.89   | 2.83   |
| SiO <sub>2</sub>               | 61.04   | 56.44   | 54.85   | 74.21   | 59.23   | 64.26   | 64.16   | 66.92  | 47.62  | 61.29  | 47.09  | 49.49  | 59.25  | 51.26  |
| Loss                           | 2.21    | 2.57    | 3.42    | 2.45    | 9.47    | 3.27    | 1.68    | 0.83   | 1.80   | 1.73   | 2.42   | 0.71   | 3.71   | 0.74   |
| Total                          | 99.76   | 99.78   | 99.43   | 99.78   | 99.64   | 99.50   | 99.31   | 99.39  | 99.70  | 99.63  | 99.58  | 99.65  | 99.52  | 99.53  |
| Li                             | 44.2    | 45.4    | 38.6    | 16.3    | 38.8    | 44.3    | 62.3    | 36.0   | 9.70   | 24.6   | 14.9   | 13.3   | 61.7   | 9.61   |
| Be                             | 2.96    | 2.83    | 1.96    | 1.21    | 1.18    | 1.73    | 1.40    | 2.25   | 1.02   | 1.38   | 1.13   | 1.61   | 2.40   | 1.44   |
| Sc                             | 16.7    | 20.7    | 23.7    | 9.87    | 11.7    | 18.9    | 17.7    | 15.7   | 35.8   | 24.7   | 35.3   | 35.4   | 11.6   | 31.8   |
| Ti                             | 4089    | 4554    | 5453    | 3194    | 3637    | 4810    | 3950    | 4628   | 18034  | 4049   | 20894  | 21592  | 5329   | 17166  |
| V                              | 110     | 143     | 149     | 60.4    | 73.2    | 134     | 117     | 104    | 382    | 154    | 411    | 370    | 129    | 351    |
| Cr                             | 90.8    | 107     | 125     | 64.2    | 115     | 128     | 115     | 115    | 79.4   | 231    | 90.4   | 36.7   | 124    | 51.1   |
| Mn                             | 649     | 657     | 277     | 496     | 570     | 242     | 667     | 464    | 1717   | 1057   | 2018   | 1903   | 468    | 1409   |
| Co                             | 17.2    | 21.3    | 23.4    | 10.8    | 6.68    | 17.4    | 19.0    | 19.4   | 51.1   | 25.5   | 49.1   | 46.5   | 28.8   | 46.7   |
| Ni                             | 42.1    | 51.0    | 57.9    | 27.2    | 14.4    | 47.1    | 56.3    | 31.9   | 54.6   | 49.5   | 54.3   | 39.8   | 59.2   | 48.3   |

|    |      |      |      |      |      |      |      |      |      |      |      |      |      |      |
|----|------|------|------|------|------|------|------|------|------|------|------|------|------|------|
| Cu | 1.03 | 1.08 | 1.20 | 4.43 | 2.10 | 51.3 | 23.6 | 13.1 | 94.2 | 27.5 | 101  | 251  | 26.2 | 192  |
| Zn | 105  | 91.7 | 77.3 | 29.4 | 41.2 | 83.4 | 101  | 82.1 | 155  | 77.8 | 154  | 133  | 182  | 99.0 |
| Ga | 22.5 | 26.7 | 32.1 | 14.4 | 12.8 | 25.6 | 21.4 | 22.3 | 24.0 | 18.6 | 24.9 | 26.3 | 30.4 | 21.6 |
| As | 5.58 | 6.34 | 7.25 | 6.72 | 3.68 | 4.21 | 1.36 | 4.08 | 5.71 | 4.09 | 5.67 | 4.84 | 2.65 | 4.47 |
| Se | 0.71 | 0.76 | 1.03 | 0.73 | 0.66 | 1.04 | 0.99 | 0.63 | 1.23 | 0.73 | 1.43 | 1.77 | 0.90 | 1.25 |
| Rb | 149  | 110  | 298  | 93.1 | 112  | 183  | 170  | 112  | 23.7 | 103  | 16.1 | 32.6 | 147  | 8.03 |
| Sr | 157  | 186  | 35.4 | 238  | 546  | 84.9 | 44.6 | 148  | 347  | 216  | 328  | 310  | 69.8 | 255  |
| Y  | 26.9 | 26.0 | 38.0 | 21.9 | 17.7 | 18.5 | 26.5 | 18.6 | 36.9 | 23.8 | 41.6 | 59.0 | 20.9 | 38.9 |
| Zr | 171  | 156  | 188  | 212  | 204  | 216  | 164  | 169  | 207  | 159  | 228  | 324  | 76.8 | 200  |
| Nb | 14.5 | 16.4 | 20.0 | 11.3 | 8.83 | 18.1 | 13.2 | 16.9 | 27.1 | 9.55 | 33.3 | 46.0 | 19.4 | 28.3 |
| Mo | 0.13 | 0.11 | 0.52 | 0.14 | 0.26 | 0.27 | 0.63 | 0.12 | 1.45 | 0.58 | 1.36 | 1.50 | 0.31 | 0.37 |
| Sn | 3.30 | 4.45 | 4.48 | 2.26 | 1.28 | 4.69 | 3.95 | 2.75 | 1.67 | 2.16 | 1.93 | 2.67 | 4.92 | 1.97 |
| Cs | 10.3 | 6.49 | 13.0 | 3.35 | 6.90 | 9.41 | 10.7 | 7.14 | 0.90 | 7.73 | 0.65 | 1.87 | 5.38 | 0.13 |
| Ba | 546  | 331  | 1363 | 389  | 331  | 799  | 765  | 632  | 413  | 425  | 323  | 350  | 578  | 179  |
| La | 36.3 | 38.3 | 53.8 | 29.9 | 23.6 | 39.1 | 31.0 | 23.8 | 27.1 | 23.3 | 32.9 | 38.7 | 41.0 | 26.9 |
| Ce | 68.5 | 76.4 | 99.8 | 56.7 | 44.5 | 68.3 | 60.4 | 45.8 | 57.9 | 45.8 | 69.9 | 81.8 | 78.0 | 56.0 |
| Pr | 7.70 | 8.26 | 10.9 | 6.35 | 4.89 | 8.30 | 6.87 | 5.17 | 7.46 | 5.28 | 8.94 | 10.5 | 9.07 | 7.15 |
| Nd | 29.3 | 30.6 | 40.3 | 24.2 | 18.7 | 31.4 | 25.8 | 19.9 | 33.1 | 20.8 | 39.6 | 44.1 | 34.0 | 30.8 |
| Sm | 5.88 | 6.06 | 7.88 | 4.76 | 3.70 | 6.28 | 4.91 | 4.34 | 7.65 | 4.44 | 9.04 | 10.4 | 6.35 | 7.47 |
| Eu | 1.23 | 1.18 | 1.69 | 0.88 | 0.82 | 1.27 | 0.99 | 1.00 | 2.48 | 1.10 | 2.83 | 2.90 | 1.26 | 2.27 |
| Gd | 5.26 | 5.23 | 6.99 | 4.17 | 3.31 | 5.26 | 4.39 | 3.92 | 7.44 | 4.17 | 8.66 | 10.7 | 5.50 | 7.59 |
| Tb | 0.77 | 0.78 | 1.05 | 0.63 | 0.48 | 0.74 | 0.69 | 0.60 | 1.14 | 0.65 | 1.29 | 1.62 | 0.80 | 1.15 |
| Dy | 4.53 | 4.65 | 6.44 | 3.71 | 2.85 | 3.60 | 4.40 | 3.37 | 6.82 | 4.05 | 7.59 | 10.0 | 4.43 | 7.07 |
| Ho | 0.95 | 0.94 | 1.35 | 0.74 | 0.60 | 0.66 | 0.94 | 0.67 | 1.36 | 0.82 | 1.49 | 2.02 | 0.84 | 1.40 |
| Er | 2.67 | 2.77 | 3.84 | 2.15 | 1.76 | 1.85 | 2.79 | 1.88 | 3.56 | 2.35 | 3.95 | 5.45 | 2.28 | 3.74 |

|    |      |      |      |      |      |      |      |      |      |      |      |      |      |      |
|----|------|------|------|------|------|------|------|------|------|------|------|------|------|------|
| Tm | 0.42 | 0.45 | 0.59 | 0.34 | 0.29 | 0.28 | 0.43 | 0.29 | 0.53 | 0.37 | 0.58 | 0.82 | 0.32 | 0.57 |
| Yb | 2.76 | 2.83 | 3.65 | 2.11 | 1.93 | 1.77 | 2.92 | 1.87 | 3.21 | 2.39 | 3.47 | 4.85 | 1.97 | 3.44 |
| Lu | 0.40 | 0.41 | 0.54 | 0.31 | 0.29 | 0.27 | 0.42 | 0.27 | 0.45 | 0.34 | 0.49 | 0.69 | 0.28 | 0.48 |
| Hf | 4.47 | 4.22 | 5.04 | 5.11 | 4.95 | 5.36 | 4.23 | 4.18 | 4.74 | 3.90 | 5.15 | 7.38 | 1.99 | 4.97 |
| Ta | 1.07 | 1.16 | 1.34 | 0.82 | 0.67 | 1.43 | 0.99 | 1.36 | 1.67 | 0.80 | 1.93 | 2.67 | 1.51 | 1.80 |
| Pb | 10.3 | 6.73 | 12.0 | 4.00 | 2.96 | 47.1 | 10.9 | 26.4 | 3.45 | 18.9 | 8.44 | 4.99 | 30.0 | 3.31 |
| Th | 12.8 | 15.0 | 17.6 | 9.88 | 9.98 | 13.3 | 12.7 | 9.89 | 2.48 | 6.85 | 2.87 | 4.38 | 14.4 | 2.94 |
| U  | 2.56 | 3.60 | 2.70 | 1.68 | 2.04 | 2.23 | 1.44 | 2.24 | 0.59 | 2.34 | 0.72 | 0.94 | 4.33 | 0.66 |
